# Supplementary material
Source: PubMed Central journal article supplement (PMC3006272)
Supplement: supp_00408.2009_figS1-2.pdf [file supp_00408.2009_figS1-2.pdf]

Supplemental Figure 1

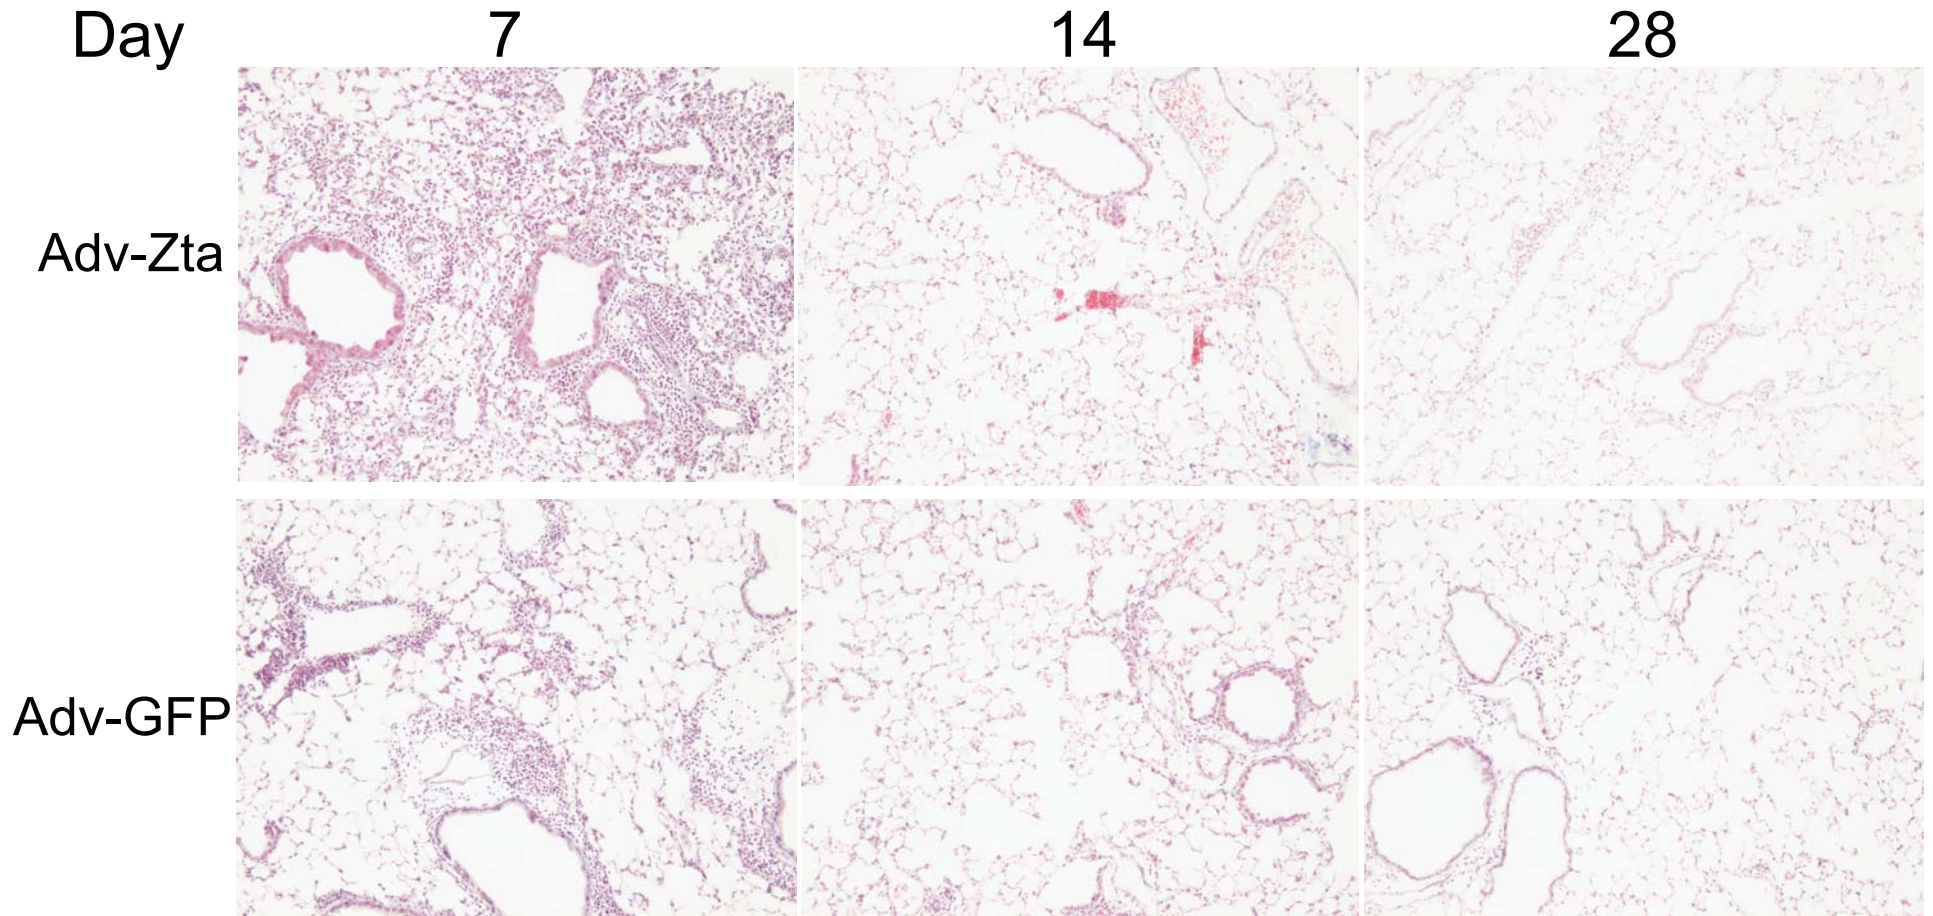

Adv-Zta- and Adv-GFP-treated mice were sacrificed on the indicated days post-exposure (top). Paraffin-embedded lung sections were stained with trichrome to reveal evidence of fibrosis. Areas displaying the most severe pathology are shown for each mouse at each time point. Robust inflammation at day 7 resolves without fibrosis on day 28 in both treatment groups.

## Supplemental Figure 2

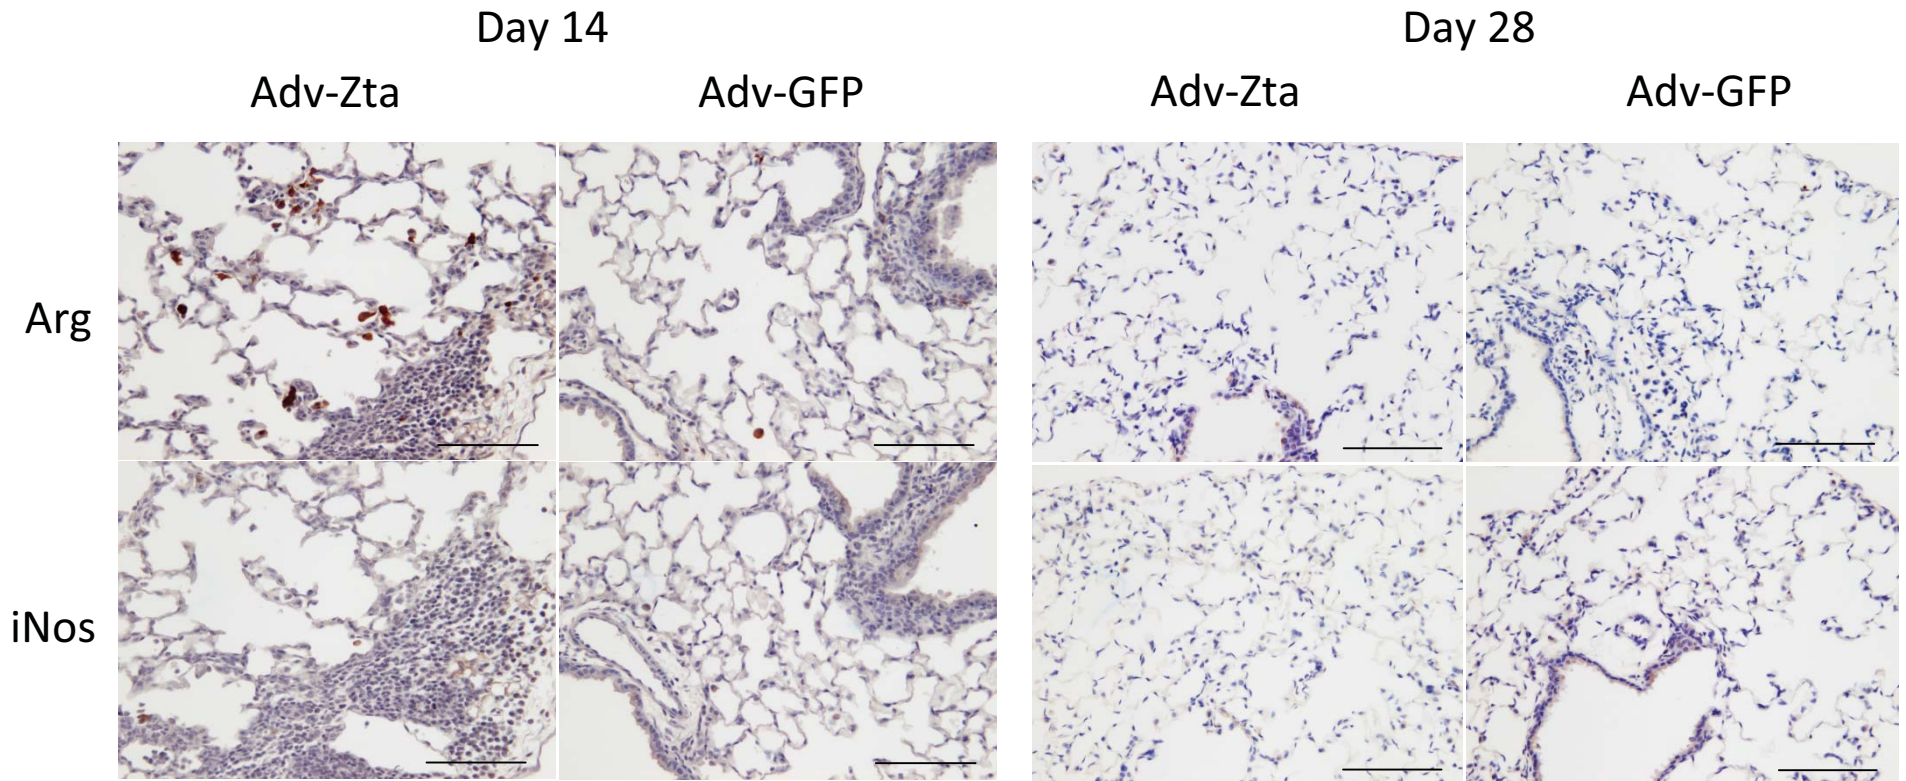

Lung sections from mice treated with the indicated virus (Adv-Zta or Adv-GFP) and sacrificed at the indicated time post-exposure (Day 14 or Day 28) were immunostained for M1 (iNos) or M2 (Arg) macrophage activation markers. M2 activation by Adv-Zta remained prominent through Day 14, but waned by Day 28. The bar indicates 100μm.
